# Supplementary material for: Micro-flower like 1T-2H-MoS2@ZIF8@C composites for efficient interfacial solar vapor generation
Source: Royal Society of Chemistry journal article supplement (doi:10.1039/d3nj03065b), 2023-01-01
Supplement: d3nj03065b1.pdf [file d3nj03065b1.pdf]

## Supporting Information

### Micro-flower like 1T-2H-MoS<sub>2</sub>@ZIF8@C composites for efficient interfacial solar vapor generation

Yulong Zheng<sup>a</sup>, Hui Zhang<sup>a</sup>, Pei Han<sup>a</sup>, Zhaoshun Zhang<sup>a</sup>, Xueqin Zuo<sup>\*, b</sup>, Qun Yang<sup>\*, b</sup>, Huaibao

Tang<sup>b</sup>, Shaowei Jin<sup>b</sup>, Guang Li<sup>\*, a,c</sup>,

<sup>a</sup> School of Materials Science and Engineering, Anhui University, Hefei 230601, China.

<sup>b</sup> School of Physics and Optoelectrics, Anhui University, Hefei 230601, China.

<sup>c</sup> Anhui Key Laboratory of Information Materials and Devices, Anhui University, Hefei 230601,  
China.

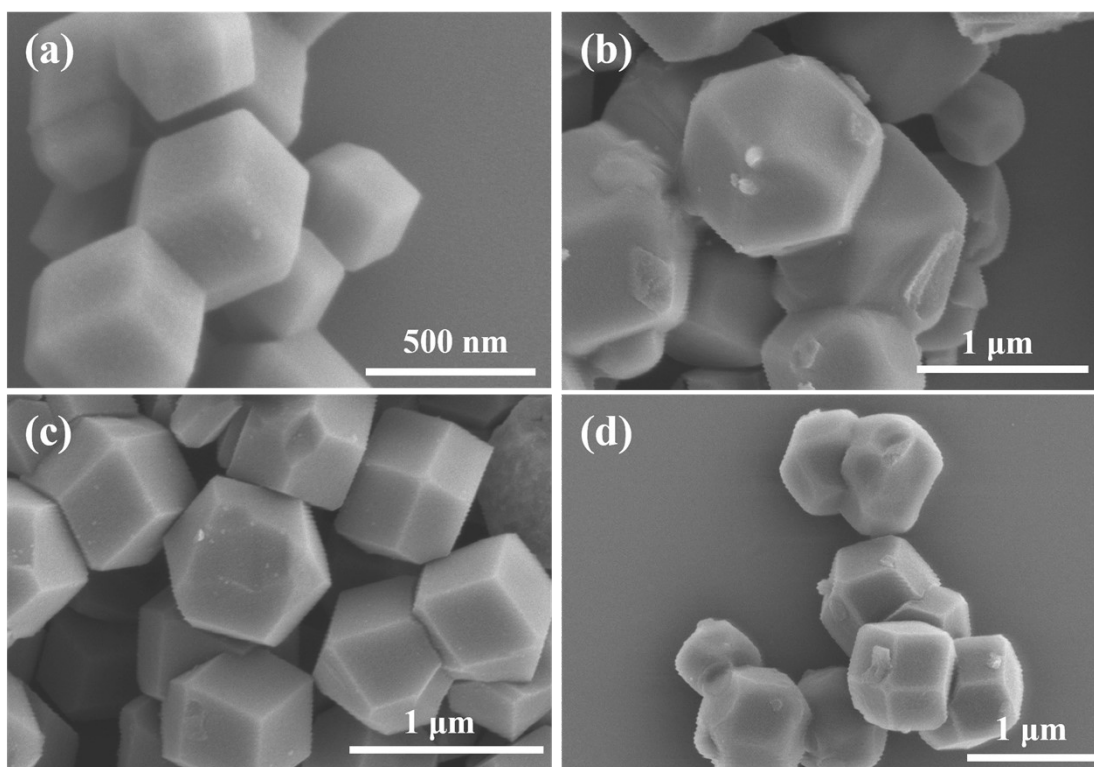

**Figure S1.** SEM images for (a) pure ZIF8 (b) ZIF8@C-700 (c) ZIF8@C-800 (d) ZIF8@C-900.

---

\*E-mail: (Xq. Z) 06028@ahu.edu.cn.

\*E-mail: (G. L.) liguang1971@ahu.edu.cn.

\*E-mail: (Q. Y) qyoung@ahu.edu.cn.

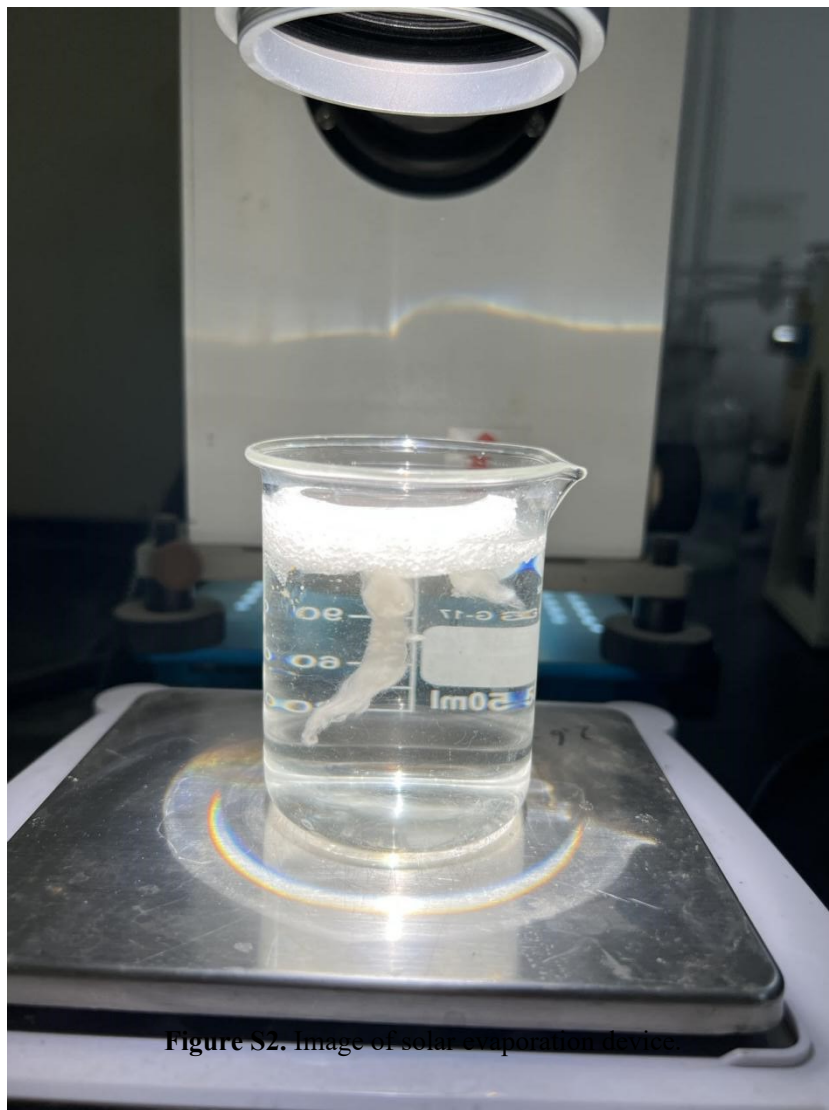

Figure S2. Image of solar evaporation device.

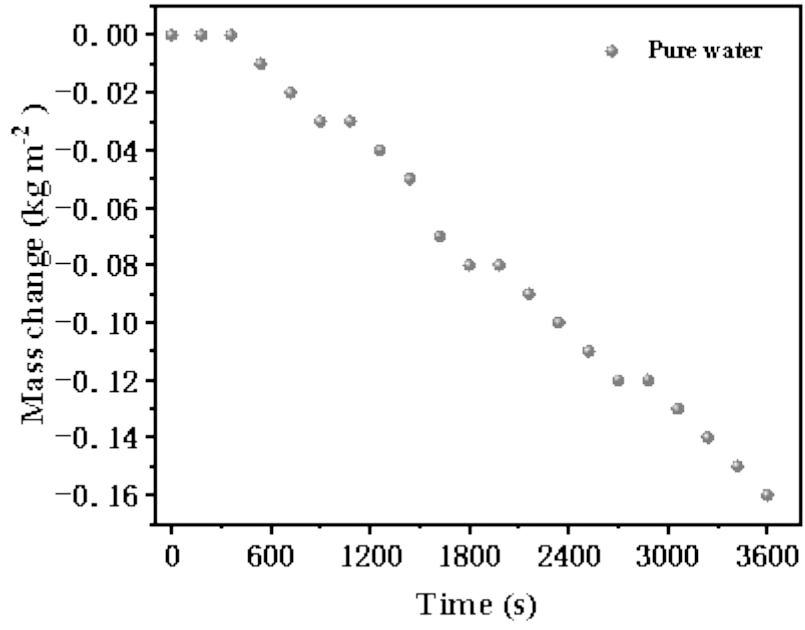

**Figure S3.** The mass change of pure water under dark evaporation.

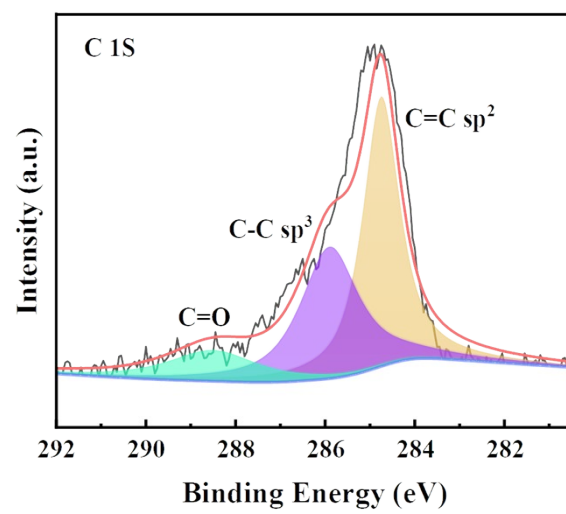

**Figure S4.** XPS spectra of the MS-ZC-8 sample: C 1S

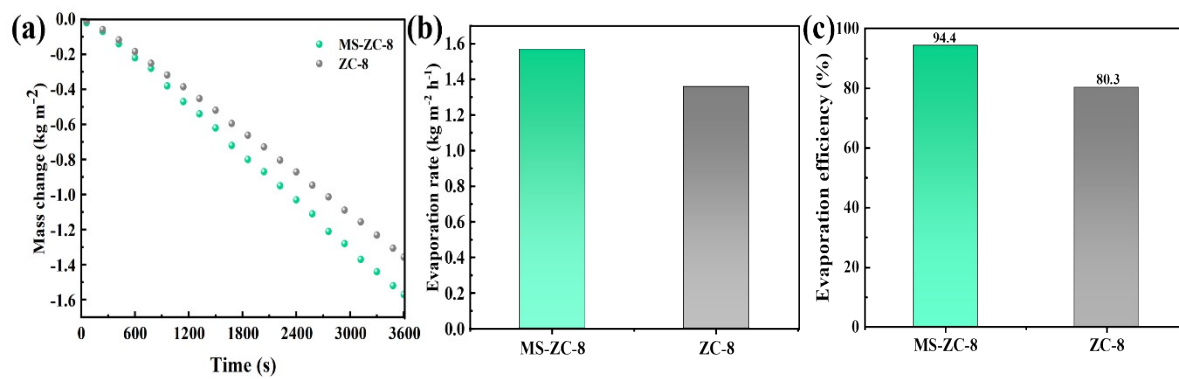

**Figure S5.** (a) Water mass change, (b) Evaporation rate, (c) Evaporation efficiency.
